# Supplementary material
Source: PubMed Central journal article supplement (PMC2824854)
Supplement: NIHMS175798-supplement-suppl.pdf [file NIHMS175798-supplement-suppl.pdf]

## Supplementary Information for

### Recognition of 5'-triphosphate by RIG-I requires short blunt double stranded RNA as contained in panhandle of negative strand virus

Martin Schlee<sup>1\*</sup>, Andreas Roth<sup>1\*</sup>, Veit Hornung<sup>2</sup>, Cristina Amparo Hagmann<sup>1</sup>, Vera Wimmenauer<sup>1</sup>, Winfried Barchet<sup>1</sup>, Christoph Coch<sup>1</sup>, Markus Janke<sup>1</sup>, Aleksandra Mihailovic<sup>4</sup>, Greg Wardle<sup>4</sup>, Stefan Juranek<sup>4</sup>, Hiroki Kato<sup>3</sup>, Taro Kawai<sup>3</sup>, Hendrik Poeck<sup>1</sup>, Katherine A. Fitzgerald<sup>2</sup>, Osamu Takeuchi<sup>3</sup>, Shizuo Akira<sup>3</sup>, Thomas Tuschl<sup>4</sup>, Eicke Latz<sup>2</sup>, Janos Ludwig<sup>1,4</sup> and Gunther Hartmann<sup>1</sup>

<sup>1</sup>Institute of Clinical Chemistry and Pharmacology, University of Bonn, Germany

<sup>2</sup>Division of Infectious Diseases and Immunology, University of Massachusetts Medical School, Worcester, USA

<sup>3</sup>Department of Host Defense, Research Institute for Microbial Diseases, Osaka University, Suita, Osaka, Japan

<sup>4</sup>Howard Hughes Medical Institute, Laboratory of RNA Biology, The Rockefeller University, New York, USA

## Supplementary Table, Figures, Legends and Literature

**Suppl. Table 1:** Sequences

| Name       | Sequence                                        | 5' end | Type | Source      |
|------------|-------------------------------------------------|--------|------|-------------|
| 3P-A       | <u>A</u> ACACACACACACACACACACUUU                | 3P     | RNA  | see methods |
| ivt3P-G    | <u>G</u> ACACACACACACACACACACUUU                | 3P     | RNA  | IVT         |
| ivt3P-Gaca | <u>G</u> ACACACACACACACACACACACA                | 3P     | RNA  | IVT         |
| 3P-G       | <u>G</u> ACACACACACACACACACACUUU                | 3P     | RNA  | see methods |
| 3P-C       | <u>C</u> ACACACACACACACACACACUUU                | 3P     | RNA  | see methods |
| 3P-U       | <u>U</u> ACACACACACACACACACACUUU                | 3P     | RNA  | see methods |
| HO-A       | <u>A</u> ACACACACACACACACACACUUU                | OH     | RNA  | Biomers     |
| P-A        | <u>A</u> ACACACACACACACACACACUUU                | P      | RNA  | Metabion    |
| P-G        | <u>G</u> ACACACACACACACACACACUUU                | P      | RNA  | Biomers     |
| P-C        | <u>C</u> ACACACACACACACACACACUUU                | P      | RNA  | Biomers     |
| P-U        | <u>U</u> ACACACACACACACACACACUUU                | P      | RNA  | Biomers     |
| AS A34     | AAAGUGUGUGUGUGUGUGUGUGUGUGU <u>U</u> GUGUGUGUGU | OH     | RNA  | Biomers     |
| AS A26     | AAAGUGUGUGUGUGUGUGUGUGUGUGU <u>U</u> GU         | OH     | RNA  | Biomers     |
| AS A25     | AAAGUGUGUGUGUGUGUGUGUGUGUGU <u>U</u> G          | OH     | RNA  | Biomers     |
| AS A24+2A  | AAAAAGUGUGUGUGUGUGUGUGUGUGU <u>U</u>            | OH     | RNA  | Biomers     |
| AS A24+A   | AAAAGUGUGUGUGUGUGUGUGUGUGU <u>U</u>             | OH     | RNA  | Biomers     |
| AS A24     | AAAGUGUGUGUGUGUGUGUGUGUGU <u>U</u>              | OH*    | RNA  | Biomers     |
| AS A23     | AAGUGUGUGUGUGUGUGUGUGUGU <u>U</u>               | OH     | RNA  | Biomers     |
| AS A21     | GUGUGUGUGUGUGUGUGUGUGU <u>U</u>                 | OH     | RNA  | Biomers     |
| AS A20     | UGUGUGUGUGUGUGUGUGUGU <u>U</u>                  | OH*    | RNA  | Biomers     |
| AS A19     | GUGUGUGUGUGUGUGUGUGU <u>U</u>                   | OH     | RNA  | Biomers     |
| AS G26     | AAAGUGUGUGUGUGUGUGUGUGUGU <u>C</u> GU           | OH     | RNA  | Biomers     |
| AS G25     | AAAGUGUGUGUGUGUGUGUGUGUGU <u>C</u> G            | OH     | RNA  | Biomers     |
| AS G24+2A  | AAAAAGUGUGUGUGUGUGUGUGUGU <u>C</u>              | OH     | RNA  | Biomers     |
| AS G24+A   | AAAAGUGUGUGUGUGUGUGUGUGU <u>C</u>               | OH     | RNA  | Biomers     |
| AS G24     | AAAGUGUGUGUGUGUGUGUGUGU <u>C</u>                | OH     | RNA  | Biomers     |
| AS G23     | AAGUGUGUGUGUGUGUGUGUGU <u>C</u>                 | OH     | RNA  | Biomers     |
| AS G21     | GUGUGUGUGUGUGUGUGUGU <u>C</u>                   | OH     | RNA  | Biomers     |
| AS G20     | UGUGUGUGUGUGUGUGUGU <u>C</u>                    | OH     | RNA  | Biomers     |
| AS G19     | GUGUGUGUGUGUGUGUGU <u>C</u>                     | OH     | RNA  | Biomers     |
| AS G17     | GUGUGUGUGUGUGUGU <u>C</u>                       | OH     | RNA  | Biomers     |
| AS G15     | GUGUGUGUGUGUGU <u>C</u>                         | OH     | RNA  | Biomers     |
| AS G13     | GUGUGUGUGUGU <u>C</u>                           | OH     | RNA  | Biomers     |
| AS C26     | AAAGUGUGUGUGUGUGUGUGUGUGU <u>G</u> GU           | OH     | RNA  | Biomers     |
| AS C24     | AAAGUGUGUGUGUGUGUGUGUGU <u>G</u>                | OH     | RNA  | Biomers     |

|                           |                                                                                                                                      |           |     |             |
|---------------------------|--------------------------------------------------------------------------------------------------------------------------------------|-----------|-----|-------------|
| AS U26                    | AAAGUGUGUGUGUGUGUGUGUGU <u>AGU</u>                                                                                                   | OH        | RNA | Biomers     |
| AS U24                    | AAAGUGUGUGUGUGUGUGUGUGU <u>A</u>                                                                                                     | OH        | RNA | Biomers     |
| AS23                      | AAAGUGUGUGUGUGUGUGUGUGU                                                                                                              | OH*       | RNA | Biomers     |
| AS21                      | AAAGUGUGUGUGUGUGUGUGU                                                                                                                | OH        | RNA | Biomers     |
| AS19                      | AAAGUGUGUGUGUGUGUGU                                                                                                                  | OH        | RNA | Biomers     |
| IVT2                      | GACGACGACGACGACGACGACGACGACGAC                                                                                                       | 3P        | RNA | IVT         |
| dAdT                      | (AT) <sub>200-4000</sub>                                                                                                             | P         | DNA | Sigma       |
| ASGFP2 24                 | AAGAUGAACUUCAGGGUCAGCGUC                                                                                                             | OH        | RNA | Biomers     |
| ASGFP2 2+5'24             | AAGAUGAACUUCAGGGUCAGCGUCAA                                                                                                           | OH        | RNA | Biomers     |
| ASGFP2 3'23               | AAGAUGAACUUCAGGGUCAGCGU                                                                                                              | OH        | RNA | Biomers     |
| ASGFP2 3'21               | AAGAUGAACUUCAGGGUCAGC                                                                                                                | OH        | RNA | Biomers     |
| ASGFP2 3'19               | AAGAUGAACUUCAGGGUCA                                                                                                                  | OH        | RNA | Biomers     |
| ASGFP2 5'21               | AUGAACUUCAGGGUCAGCGUC                                                                                                                | OH        | RNA | Biomers     |
| ASGFP2 5'20               | UGAACUUCAGGGUCAGCGUC                                                                                                                 | OH        | RNA | Biomers     |
| ASGFP2 5'19               | GAACUUCAGGGUCAGCGUC                                                                                                                  | OH        | RNA | Biomers     |
| ASGFP2 5'18               | AACUUCAGGGUCAGCGUC                                                                                                                   | OH        | RNA | Biomers     |
| ASGFP2 5'16               | CUUCAGGGUCAGCGUC                                                                                                                     | OH        | RNA | Biomers     |
| ASGFP2 5'14               | UCAGGGUCAGCGUC                                                                                                                       | OH        | RNA | Biomers     |
| ASGFP2 5'9                | GUCAGCGUC                                                                                                                            | OH        | RNA | Biomers     |
| AS GFP2 C>U1              | AAGAUGAACUUCAGGGUCAGCGU <u>U</u>                                                                                                     | OH        | RNA | Biomers     |
| AS GFP2 C>A1              | AAGAUGAACUUCAGGGUCAGCGUA                                                                                                             | OH        | RNA | Biomers     |
| AS GFP2 U>A2              | AAGAUGAACUUCAGGGUCAGCGAC                                                                                                             | OH        | RNA | Biomers     |
| AS GFP2 8b3               | AAGAUGAACUUCAGAGCCAGCGUC                                                                                                             | OH        | RNA | Biomers     |
| HO-VH1-bio**              | ACACACACACACACACACACAAAACC                                                                                                           | OH        | RNA | Dharmacon   |
| 3P-VH1-bio**              | ACACACACACACACACACACAAAACC                                                                                                           | OH        | RNA | see methods |
| AS-VH1                    | GGUUUUGUGUGUGUGUGUGUGUGUGU                                                                                                           | OH        | RNA | Dharmacon   |
| 3P-GFP1                   | GGGGCUGACCCUGAAGUUCAUCUU                                                                                                             | <b>3P</b> | RNA | see methods |
| 3P-GFP2                   | GACGCUGACCCUGAAGUUCAUCUU                                                                                                             | <b>3P</b> | RNA | see methods |
| 3P-GFP3                   | GGGGCGCUGACGCCUGAAGUUCA                                                                                                              | <b>3P</b> | RNA | see methods |
| Rabies Panhandle match    | GACGCUUAACAAAUAAACAACAAAAAUGAGAAAA<br>ACAAUCAUAUGUCUGUUUUUUCUUUGAUCUGGUU<br>GUUAAGCGUC                                               | <b>3P</b> | RNA | IVT         |
| Rabies Panhandle mismatch | GACGCUUAACAAAUAAACAACAAAAAUGAGAAAA<br>ACAAUCAUAUGUCUGUUUUUUCUUUGAUCUGGUU<br>GUUAAGCGAUAUUUUAAAAAAAAAAAAAAAAAAAA<br>AAAAAAAAAAAAAAAAA | <b>3P</b> | RNA | IVT         |

RNA and DNA stimuli. 3P = triphosphate, P = monophosphate, IVT = in vitro transcription

\* Oligos used for alpha screen were labeled with biotin at the 5' end.

\*\* VH1-bio and 3P-VH1-bio were labeled with c6-biotin at the 3' end.

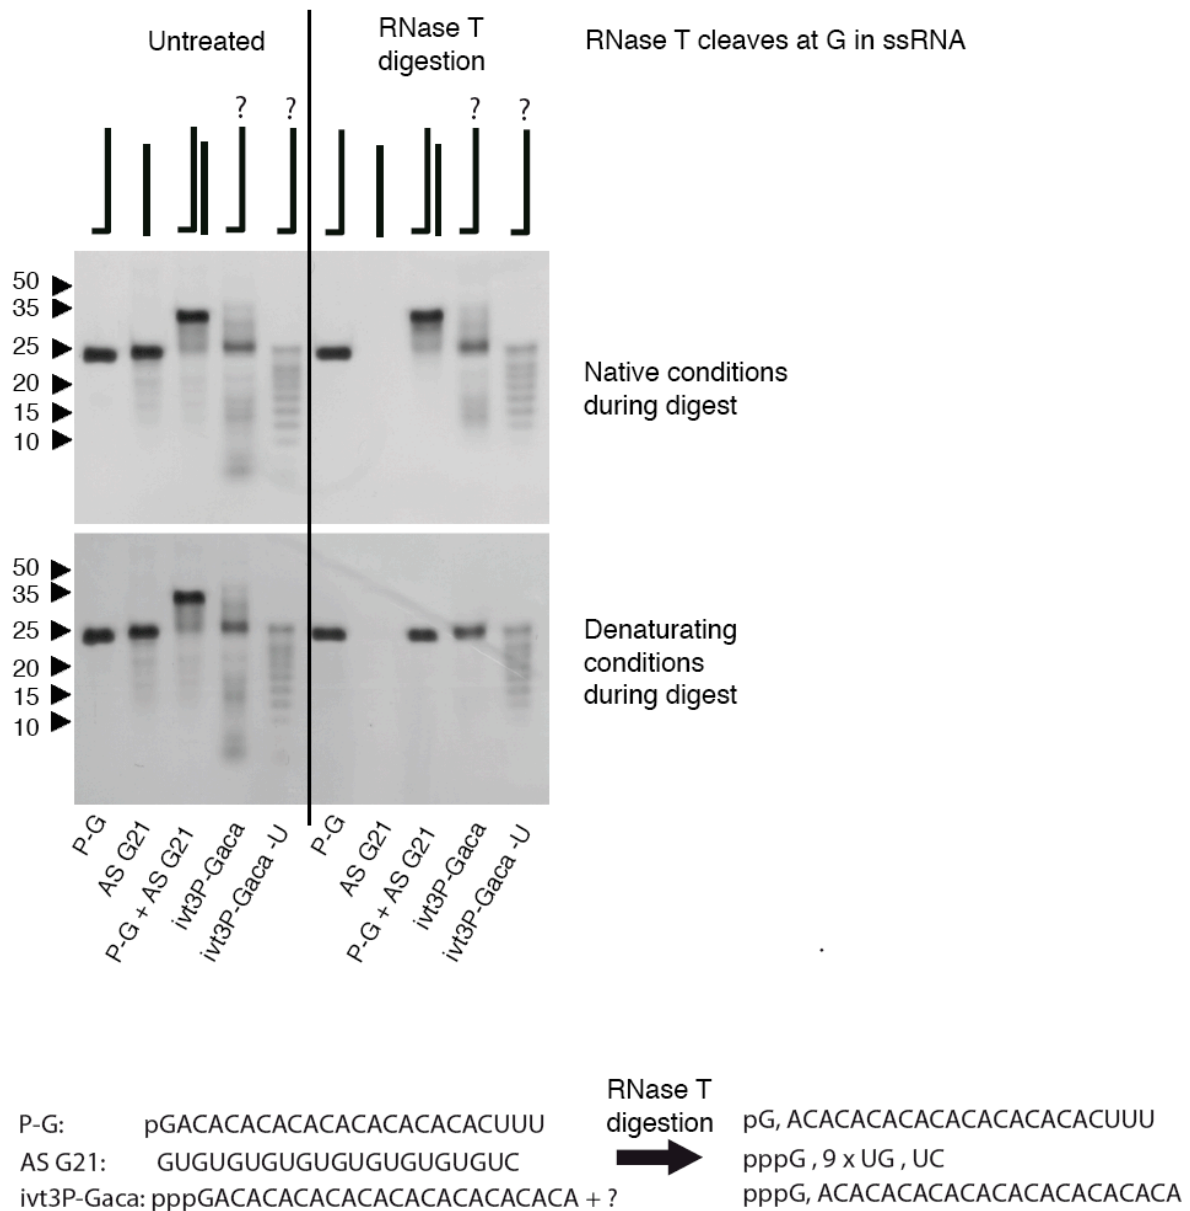

### Suppl. Fig. 1

#### T7 polymerase in vitro transcription mix contains high amounts of sequences not encoded by the DNA-template.

Indicated ssRNA and dsRNA oligonucleotides and in vitro-transcribed RNA (ivt3P-Gaca) were digested by RNaseT under native conditions (37°C, upper panel) or denaturing conditions ((Nallagatla et al., 2007), 6M urea, 50°C, lower panel). After digestion, the RNA was separated by urea polyacrylamide gelelectrophoresis and stained with Methylene Blue. The RNA length marker is denoted as number of nt.



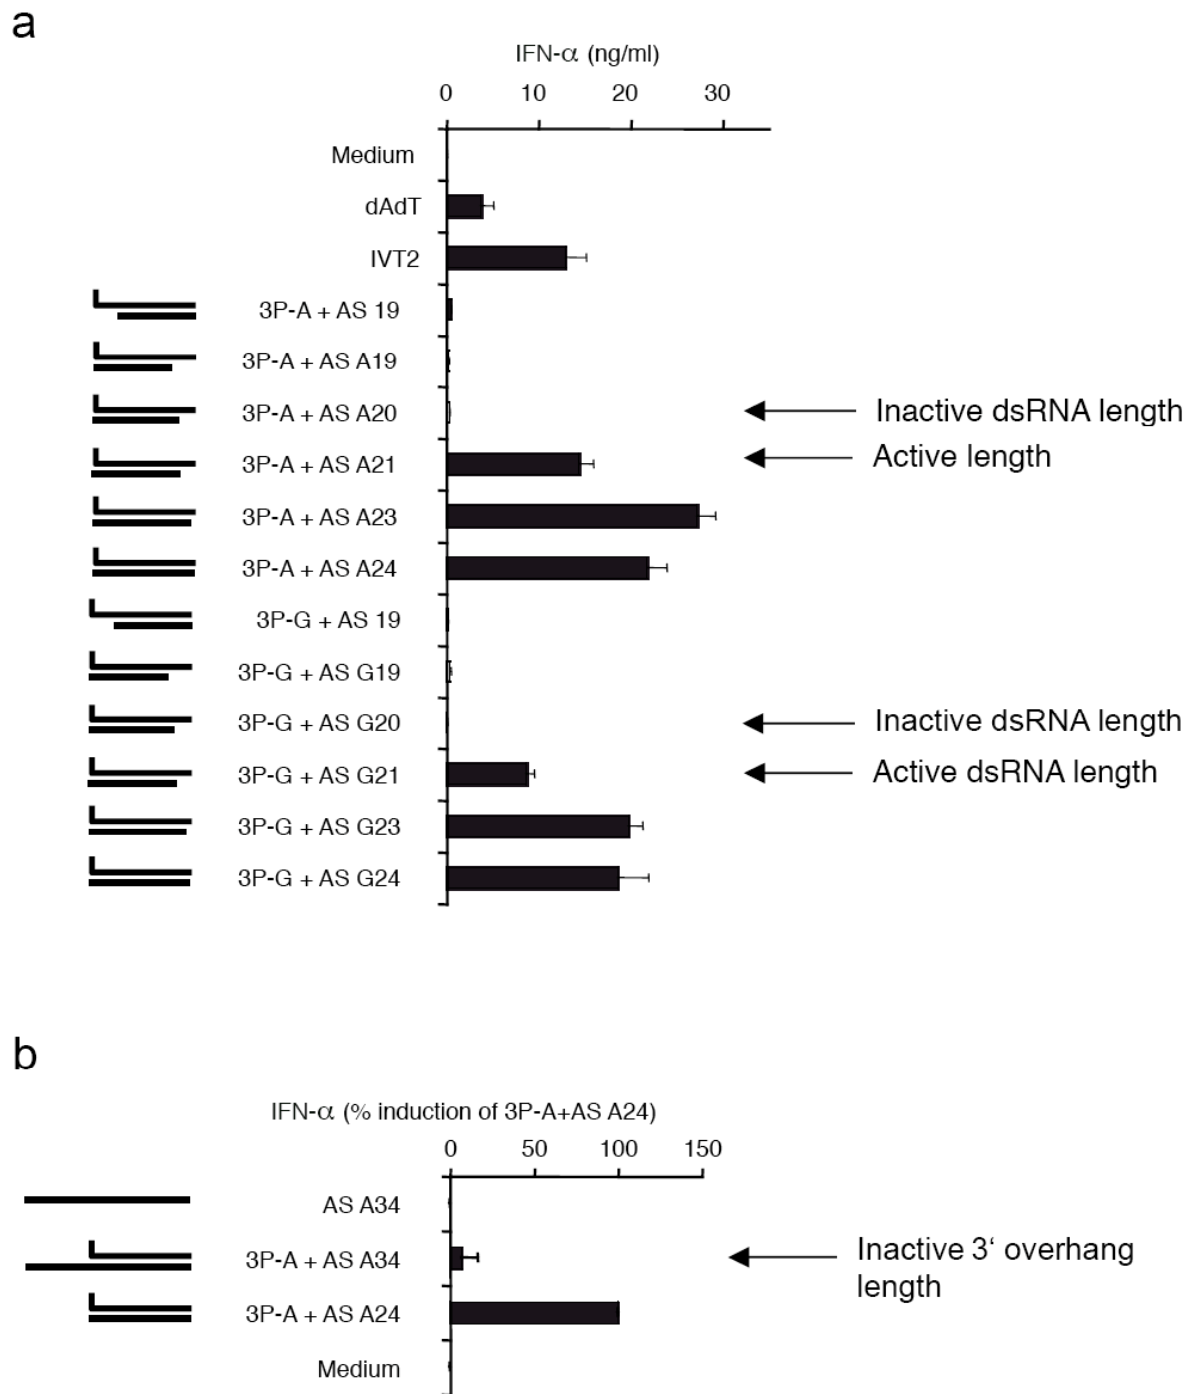

**Suppl. Fig. 3: Length and 5' and 3' overhang impact on IFN- $\alpha$  stimulating activity of short double strand RNA.**

Purified monocytes were stimulated with the indicated single strand or double strand synthetic RNA oligonucleotides. IFN- $\alpha$  production was analyzed 24 hours after stimulation. a: 3P-G and 3P-A hybridized with antisense strands of different lengths and binding positions are compared. b: 3P-A hybridized with an antisense strand resulting in a double strand RNA with a 10 base long 3' overhang at the triphosphate end.



## References

**Nallagatla, S.R., Hwang, J., Toroney, R., Zheng, X., Cameron, C.E., and Bevilacqua, P.C. (2007). 5'-triphosphate-dependent activation of PKR by RNAs with short stem-loops. *Science* 318, 1455-1458.**

**Zuker, M. (2003). Mfold web server for nucleic acid folding and hybridization prediction. *Nucleic Acids Res* 31, 3406-3415.**
